# Supplementary material for: Biological and Clinical Changes in a Pediatric Series Treated with Off-Label JAK Inhibitors
Source: PubMed Central journal article supplement (PMC7590237; doi:10.3390/ijms21207767), 2020-10-20
Supplement: ijms-21-07767-s001.pdf [file ijms-21-07767-s001.pdf]

**Table S1. List of genes resulted from single patient pathway analysis.**

| Gene    | pt#1  | pt#2 | pt#3 | pt#6 | pt#7 |
|---------|-------|------|------|------|------|
| ADAR2   | Green |      |      |      |      |
| AGO4    |       | Pink |      |      |      |
| AKT1    |       | Pink |      |      |      |
| ARRB2   |       | Pink |      |      |      |
| B4GALT1 |       | Pink |      |      |      |
| BIRC2   |       |      | Blue |      |      |
| BIRC3   |       |      | Blue |      | Grey |
| BST2    | Green |      |      | Red  |      |
| CEBPA   |       | Pink |      |      |      |
| CEBPB   |       | Pink |      |      |      |
| CREBBP  |       | Pink |      |      |      |
| CSF3R   |       | Pink |      |      |      |
| DDX58   | Green |      |      |      |      |
| E2F3    |       | Pink |      |      |      |
| EIF2AK2 | Green |      | Blue |      | Grey |
| ERF     |       | Pink |      |      |      |
| ETS2    |       | Pink |      |      |      |
| FCGR1B  | Green |      |      |      |      |
| FURIN   |       | Pink |      |      |      |
| GBP1    | Green |      |      |      |      |
| GBP2    | Green |      |      |      |      |
| GBP3    | Green |      |      |      |      |
| GBP5    | Green |      |      |      |      |
| GBP6    | Green |      |      |      |      |
| GZMB    |       | Pink |      |      |      |
| H2AC6   |       | Pink |      |      |      |
| H2BC21  |       | Pink |      |      |      |
| H2BC4   |       | Pink |      |      |      |
| H3-3A   |       | Pink |      |      |      |
| H3F3A   |       | Pink |      |      |      |
| HDAC5   |       | Pink |      |      |      |
| HERC5   | Green |      | Blue |      |      |
| HLA-G   |       |      |      | Red  |      |
| IFI27   | Green |      |      | Red  |      |
| IFI35   | Green |      |      | Red  |      |
| IFI6    | Green |      |      | Red  |      |
| IFIT1   | Green |      | Blue | Red  |      |
| IFIT2   | Green |      |      | Red  |      |
| IFIT3   | Green |      |      | Red  |      |
| IFITM1  | Green |      |      | Red  |      |
| IFITM2  |       |      |      | Red  |      |
| IFITM3  |       |      |      | Red  |      |
| IFNGR1  | Green |      |      |      |      |
| IL6R    |       | Pink | Blue |      |      |
| IL6ST   |       |      | Blue |      |      |
| IRF7    | Green |      |      | Red  |      |
| ISG15   | Green |      | Blue | Red  | Grey |
| ISG20   | Green |      |      | Red  | Grey |
| JAK2    | Green |      | Blue |      |      |
| LEF1    |       | Pink |      |      |      |
| MAML3   |       | Pink |      |      |      |
| MAPK1   |       | Pink |      |      |      |
| MAPK3   |       | Pink |      |      |      |
| MDM2    |       | Pink |      |      |      |
| MT2A    | Green |      |      |      |      |

|           |       |      |      |     |      |
|-----------|-------|------|------|-----|------|
| MX1       | Green |      | Blue | Red |      |
| MX2       | Green |      |      |     |      |
| MYC       |       | Pink |      |     |      |
| NCSTN     |       | Pink |      |     |      |
| NEURL1    |       | Pink |      |     |      |
| NOTCH1    |       | Pink |      |     |      |
| NOTCH2    |       | Pink |      |     |      |
| NUMB      |       | Pink |      |     |      |
| OAS1      | Green |      |      | Red |      |
| OAS2      | Green |      |      |     |      |
| OAS3      | Green |      |      |     |      |
| OASL      | Green |      |      |     |      |
| PLXND1    |       | Pink |      |     |      |
| PML       | Green |      |      |     |      |
| PSEN1     |       | Pink |      |     |      |
| PSMC6     |       |      | Blue |     |      |
| RARA      |       | Pink |      |     |      |
| RBPJ      |       | Pink |      |     |      |
| RBX1      |       | Pink |      |     |      |
| RPL21     |       |      |      |     | Grey |
| RPL32     |       |      |      |     | Grey |
| RPL37     |       |      |      |     | Grey |
| RPL41     |       |      |      |     | Grey |
| RPL7      |       |      |      |     | Grey |
| RPS23     |       |      |      |     | Grey |
| RPS25     |       |      |      |     | Grey |
| RPS27A    |       | Pink |      |     | Grey |
| RSAD2     | Green |      |      |     |      |
| RXRA      |       | Pink |      |     |      |
| SEL1L     |       | Pink |      |     |      |
| SOCS1     | Green |      |      | Red |      |
| SOCS3     |       |      | Blue | Red |      |
| SP1       |       | Pink |      |     |      |
| SP100     | Green |      |      |     |      |
| SPI1      |       | Pink |      |     |      |
| ST3GAL4   |       | Pink |      |     |      |
| STAT1     | Green | Pink |      | Red |      |
| STAT2     | Green |      |      |     |      |
| STAT2     |       |      |      | Red |      |
| STAT3     |       | Pink |      |     |      |
| TAL1      |       | Pink |      |     |      |
| TBL1X     |       | Pink |      |     |      |
| TFDP      |       | Pink |      |     |      |
| TFDP1     |       | Pink |      |     |      |
| TLE3      |       | Pink |      |     |      |
| TNFAIP3   | Green |      |      |     |      |
| TNFRSF13C |       |      |      |     | Grey |
| TNFRSF18  |       |      | Blue |     |      |
| TNFRSF1A  |       |      | Blue |     |      |
| TNFRSF4   |       |      | Blue |     |      |
| TNFRSF9   |       |      | Blue |     |      |
| TNFSF13B  |       |      | Blue |     | Grey |
| TNFSF14   |       |      | Blue |     |      |
| TRIM10    | Green |      |      |     |      |
| TRIM22    | Green |      |      |     |      |
| TRIM25    | Green |      |      |     |      |
| TRIM38    | Green |      |      |     |      |
| TRIM5     | Green |      |      |     |      |
| TYK2      |       |      | Blue |     |      |

|               |  |  |  |  |  |
|---------------|--|--|--|--|--|
| <i>UBA52</i>  |  |  |  |  |  |
| <i>UBB</i>    |  |  |  |  |  |
| <i>UBE2L6</i> |  |  |  |  |  |
| <i>USP18</i>  |  |  |  |  |  |
| <i>WWP2</i>   |  |  |  |  |  |
| <i>XAF1</i>   |  |  |  |  |  |

Genes shared by two or more subjects are highlighted. Background colors display genes expressed in different patients: patient #1 in green, patient #2 in pink, patient #3 in light blue, patient #6 in red, and patient #7 in grey.
